# Supplementary material for: Macrophage secretion of miR-106b-5p causes renin-dependent hypertension
Source: PubMed Central journal article supplement (PMC7511948; doi:10.1038/s41467-020-18538-x), 2020-09-23
Supplement: 41467_2020_18538_MOESM4_ESM.pdf [file 41467_2020_18538_MOESM4_ESM.pdf]

## Description of Additional Supplementary Files

File Name: Supplementary Data 1

Description: **Macrophage Secretion of miR-106b-5p Causes Renin-Dependent Hypertension.** Unbiased miRNA expression analyses using media from KODMAC or control peritoneal macrophages (n=9/group) by Affymetrix GeneChip miRNA 4.0 microarrays by Washington University's Genome Technology Access Center. Post-processing of array signal data was performed with Partek Genomics Suite 6.6 (Partek, St Louis, MO).
